# Supplementary material for: Enhancing magnetic coupling in MN 4 –graphene via strain engineering
Source: Royal Society of Chemistry journal article supplement (doi:10.1039/d5cp00248f), 2025-01-01
Supplement: d5cp00248f1.pdf [file d5cp00248f1.pdf]

## Supplementary Information

### Enhancing Magnetic Coupling in $MN_4$ -Graphene via Strain Engineering

Mahnaz Rezaei<sup>1</sup>, Jahanfar Abouie<sup>2,\*</sup>, Fariba Nazari<sup>1,3,\*</sup>

*<sup>1</sup>Department of Chemistry, Institute for Advanced Studies in Basic Sciences,  
Zanjan 45137-66731, Iran*

*<sup>2</sup>Department of Physics, Institute for Advanced Studies in Basic Sciences,  
Zanjan 45137-66731, Iran*

*<sup>3</sup>Center of Climate Change and Global Warming, Institute for Advanced Studies in Basic  
Sciences, Zanjan 45137-66731, Iran*

\*Corresponding authors: [jahan@iasbs.ac.ir](mailto:jahan@iasbs.ac.ir), [nazari@iasbs.ac.ir](mailto:nazari@iasbs.ac.ir)

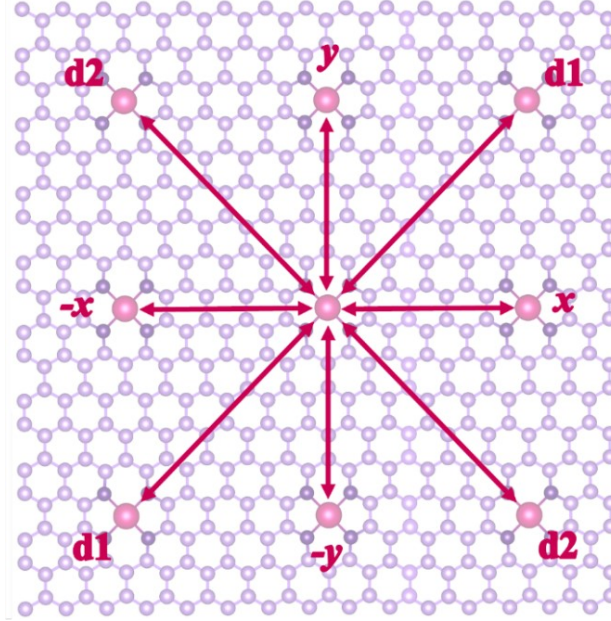

**Fig. S1** The exchange couplings of the M atom located at the origin of a unit-cell with the neighboring atoms are shown with the purple double-head arrows along  $\pm x$ ,  $\pm y$ , and the two main diameter (d1, d2) directions.

**Table S1** The cohesive energy (CE) of the unstrained and strained  $MN_4-G$  layers. The CE defined as  $CE = \frac{[E_{MN_4-G} - (N_C E_C + N_N E_N + N_M E_M)]}{q}$ , where  $E_{MN_4-G}$  is the total energy of the studied layers, and  $E_C$ ,  $E_N$  and  $E_M$  are the total energies of free C, N, and M atoms, respectively.  $N_C$ ,  $N_N$ , and  $N_M$  are the number of C, N, and M atoms in the supercell, respectively. The parameter  $q$  stands for the total number of atoms in the supercell. For graphene, the CE per atom is -5.8275 eV.

| Layer | CE/atom (eV) |
|-------|--------------|-------|--------------|-------|--------------|-------|--------------|
| Mn-Mn | -7.9709      | Fe-Fe | -8.0017      | Co-Co | -8.0198      | Cu-Cu | -7.9752      |
| Mn-Fe | -7.9698      | Fe-Mn | -7.9976      | Co-Mn | -8.0059      | Cu-Mn | -7.9738      |
| Mn-Co | -7.9658      | Fe-Co | -8.0004      | Co-Fe | -8.0043      | Cu-Fe | -7.9750      |
| Mn-Cu | -7.9730      | Fe-Cu | -7.9980      | Co-Cu | -8.0211      | Cu-Co | -7.9725      |

**Table S2** Fitting parameters of  $J_r$  in Eq. (8), for MnN<sub>4</sub>-G layer under the strain.  $k_F = [(k_F^x)^2 + (k_F^y)^2]^{1/2}$  is the Fermi wave number,  $k_F^x$  and  $k_F^y$  are components of the Fermi wave vector; and  $J_0$  is a constant along  $\pm x$ ,  $\pm y$ , and the two main diameter (d1, d2) directions.

| MnN <sub>4</sub> -G | Direction | $J_0(meV)$ | $k_F^x(\text{\AA}^{-1})$ | $k_F^y(\text{\AA}^{-1})$ | $k_F(\text{\AA}^{-1})$ |
|---------------------|-----------|------------|--------------------------|--------------------------|------------------------|
| $\eta = -0.36$      | $x$       | -5.548     | 0.118                    | -----                    | -----                  |
|                     | $y$       | -0.003     | -----                    | 0.002                    | -----                  |
|                     | d1        | -3.939     | -----                    | -----                    | 0.118                  |
|                     | d2        | -3.949     | -----                    | -----                    | 0.118                  |
| $\eta = -0.20$      | $x$       | -6.313     | 0.121                    | -----                    | -----                  |
|                     | $y$       | -0.007     | -----                    | 0.002                    | -----                  |
|                     | d1        | -2.210     | -----                    | -----                    | 0.121                  |
|                     | d2        | -0.900     | -----                    | -----                    | 0.121                  |
| $\eta = 0.00$       | $x$       | -75.610    | 0.123                    | -----                    | -----                  |
|                     | $y$       | 41.040     | -----                    | 0.125                    | -----                  |
|                     | d1        | -4.402     | -----                    | -----                    | 0.175                  |
|                     | d2        | -1.570     | -----                    | -----                    | 0.175                  |
| $\eta = 0.03$       | $x$       | -118.600   | 0.150                    | -----                    | -----                  |
|                     | $y$       | -53.000    | -----                    | 0.145                    | -----                  |
|                     | d1        | -15.560    | -----                    | -----                    | 0.209                  |
|                     | d2        | -8.486     | -----                    | -----                    | 0.209                  |

**Table S3** Fitting parameters of  $J_r$  in Eq. (8), for FeN<sub>4</sub>-G layer under the strain. Other parameters are detailed in the caption of Table S2.

| FeN <sub>4</sub> -G | Direction | $J_0(meV)$ | $k_F^x(\text{\AA}^{-1})$ | $k_F^y(\text{\AA}^{-1})$ | $k_F(\text{\AA}^{-1})$ |
|---------------------|-----------|------------|--------------------------|--------------------------|------------------------|
| $\eta = -0.16$      | $x$       | -0.600     | 0.117                    | -----                    | -----                  |
|                     | $y$       | 0.361      | -----                    | 0.150                    | -----                  |
|                     | d1        | -0.100     | -----                    | -----                    | 0.190                  |
|                     | d2        | 0.200      | -----                    | -----                    | 0.190                  |
| $\eta = 0.00$       | $x$       | -0.164     | 0.125                    | -----                    | -----                  |
|                     | $y$       | -0.029     | -----                    | 0.022                    | -----                  |
|                     | d1        | -0.143     | -----                    | -----                    | 0.127                  |
|                     | d2        | -1.300     | -----                    | -----                    | 0.127                  |
| $\eta = 0.20$       | $x$       | -1.46      | 0.108                    | -----                    | -----                  |
|                     | $y$       | -0.084     | -----                    | 0.037                    | -----                  |
|                     | d1        | 0.188      | -----                    | -----                    | 0.114                  |
|                     | d2        | -0.310     | -----                    | -----                    | 0.114                  |
| $\eta = 0.23$       | $x$       | -0.450     | 0.125                    | -----                    | -----                  |
|                     | $y$       | 0.753      | -----                    | 0.091                    | -----                  |
|                     | d1        | 0.191      | -----                    | -----                    | 0.155                  |
|                     | d2        | 0.319      | -----                    | -----                    | 0.155                  |

**Table S4** Fitting parameters of  $J_r$  in Eq. (8), for CoN<sub>4</sub>-G layer under the strain. Other parameters are detailed in the caption of Table S2.

| CoN <sub>4</sub> -G | Direction | $J_0(meV)$ | $k_F^x(\text{\AA}^{-1})$ | $k_F^y(\text{\AA}^{-1})$ | $k_F(\text{\AA}^{-1})$ |
|---------------------|-----------|------------|--------------------------|--------------------------|------------------------|
| $\eta = 0.00$       | $x$       | -0.004     | 0.129                    | -----                    | -----                  |
|                     | $y$       | -0.0004    | -----                    | 0.029                    | -----                  |
|                     | d1        | -0.001     | -----                    | -----                    | 0.132                  |
|                     | d2        | -0.001     | -----                    | -----                    | 0.132                  |
| $\eta = 0.16$       | $x$       | 48.460     | 0.223                    | -----                    | -----                  |
|                     | $y$       | 0.099      | -----                    | 0.097                    | -----                  |
|                     | d1        | 0.240      | -----                    | -----                    | 0.243                  |
|                     | d2        | -3.721     | -----                    | -----                    | 0.243                  |
| $\eta = 0.36$       | $x$       | 0.833      | 0.099                    | -----                    | -----                  |
|                     | $y$       | -0.100     | -----                    | 0.046                    | -----                  |
|                     | d1        | 0.109      | -----                    | -----                    | 0.109                  |
|                     | d2        | -0.109     | -----                    | -----                    | 0.109                  |
| $\eta = 0.39$       | $x$       | 19.65      | 0.221                    | -----                    | -----                  |
|                     | $y$       | 0.131      | -----                    | 0.111                    | -----                  |
|                     | d1        | 0.047      | -----                    | -----                    | 0.247                  |
|                     | d2        | -1.391     | -----                    | -----                    | 0.247                  |

**Table S5** Calculated ( $k_F^{Cal}$ ) and fitted ( $k_F^{Fit}$ ) Fermi wave numbers for various strained and unstrained MN<sub>4</sub>-G layers under the strain.

| MnN <sub>4</sub> -G |                              |                              | FeN <sub>4</sub> -G |                              |                              | CoN <sub>4</sub> -G |                              |                              |
|---------------------|------------------------------|------------------------------|---------------------|------------------------------|------------------------------|---------------------|------------------------------|------------------------------|
| $\eta$              | $k_F^{Cal}(\text{\AA}^{-1})$ | $k_F^{Fit}(\text{\AA}^{-1})$ | $\eta$              | $k_F^{Cal}(\text{\AA}^{-1})$ | $k_F^{Fit}(\text{\AA}^{-1})$ | $\eta$              | $k_F^{Cal}(\text{\AA}^{-1})$ | $k_F^{Fit}(\text{\AA}^{-1})$ |
| -0.36               | 0.112                        | 0.118                        | -0.16               | 0.106                        | 0.190                        | 0.00                | 0.105                        | 0.132                        |
| -0.20               | 0.100                        | 0.121                        | 0.00                | 0.120                        | 0.127                        | 0.16                | 0.149                        | 0.243                        |
| 0.00                | 0.125                        | 0.175                        | 0.20                | 0.101                        | 0.114                        | 0.36                | 0.139                        | 0.109                        |
| 0.03                | 0.137                        | 0.209                        | 0.23                | 0.122                        | 0.155                        | 0.39                | 0.132                        | 0.247                        |
